# Supplementary material for: Target Identification of the Marine Natural Products Dictyoceratin-A and -C as Selective Growth Inhibitors in Cancer Cells Adapted to Hypoxic Environments
Source: PubMed Central journal article supplement (PMC6471994; doi:10.3390/md17030163), 2019-03-08
Supplement: marinedrugs-17-00163-s001.pdf [file marinedrugs-17-00163-s001.pdf]

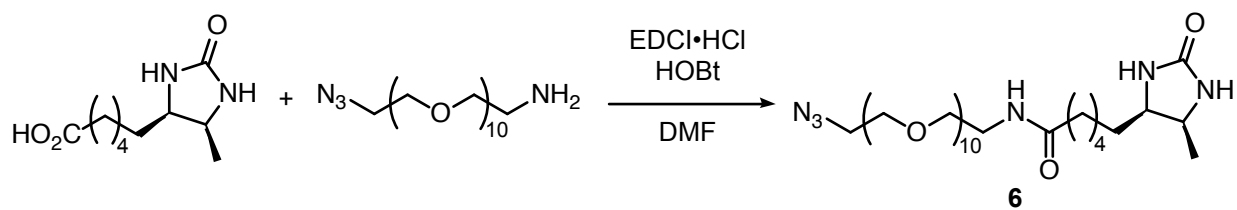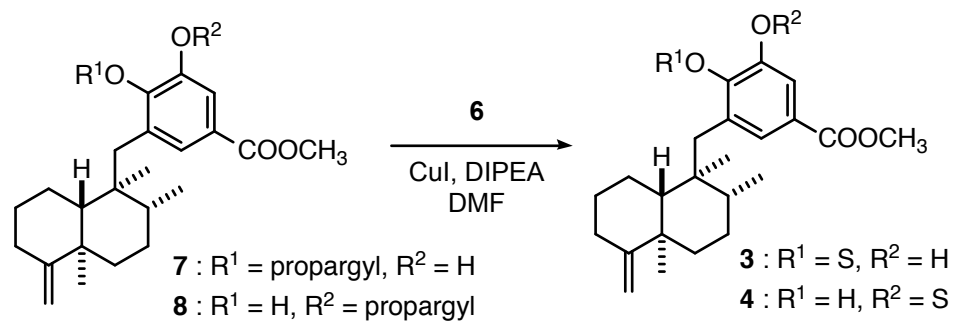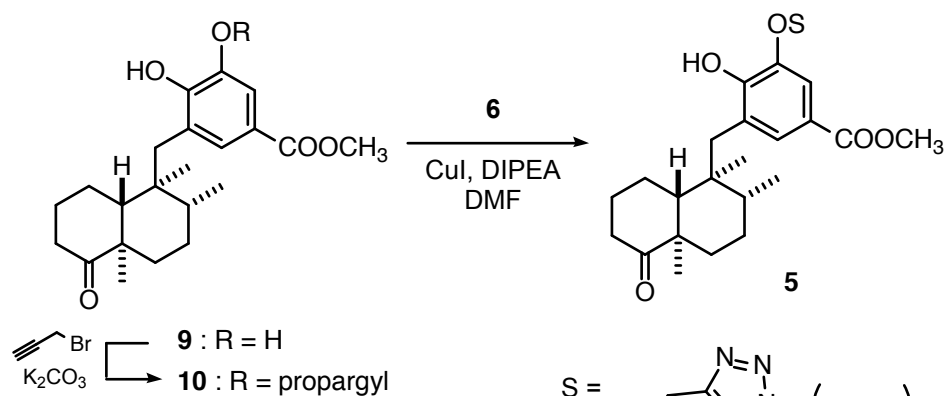

**Supplementary scheme S1.** Synthesis of probe molecules **3**, **4**, and **5**.
